# Supplementary material for: Novel Non-Steroidal Facial Cream Demonstrates Antifungal and Anti-Inflammatory Properties in Ex Vivo Model for Seborrheic Dermatitis
Source: PubMed Central journal article supplement — Dermatol Ther (Heidelb). 2019 Jul 5;9(3):571–8. doi: 10.1007/s13555-019-0311-4 (PMC6704224; doi:10.1007/s13555-019-0311-4), 2019-07-05
Supplement: 13555_2019_311_MOESM1_ESM.pdf [file 13555_2019_311_MOESM1_ESM.pdf]

## SUPPLEMENTARY TABLES

**Supplementary Table 1.** Skin viability post-stripping represented by levels of LDH and RES

|                |                | 24 h           | 48 h          | 72 h           |
|----------------|----------------|----------------|---------------|----------------|
| <b>LDH (%)</b> | <b>Control</b> | 100 ± 17.96    | 100 ± 5.25    | 100 ± 12.67    |
|                | <b>TS</b>      | 148.87 ± 18.54 | 114.85 ± 1.09 | 106.39 ± 11.61 |
| <b>RES (%)</b> | <b>Control</b> | 100 ± 15.32    | 100 ± 10.84   | 100 ± 12.24    |
|                | <b>TS</b>      | 78.32 ± 6.48   | 96.28 ± 1.65  | 99.79 ± 10.71  |

TS: Tape stripped skin; values are presented as mean % ± standard deviation with respect to Control 0 hours values (n=4).

**Supplementary Table 2.** Post-stripping levels of cytokines interleukins IL-6, IL-8, TNF- $\alpha$ 

|                                                  |                | <b>24 h</b>          | <b>48 h</b>          | <b>72 h</b>          |
|--------------------------------------------------|----------------|----------------------|----------------------|----------------------|
| <b>TNF-<math>\alpha</math></b><br><b>(pg/ml)</b> | <b>Control</b> | 108.68 $\pm$ 4.9     | 112.96 $\pm$ 11.56   | 121.69 $\pm$ 24.07   |
|                                                  | <b>TS</b>      | 147.67 $\pm$ 18.61   | 125.24 $\pm$ 14.68   | 104.46 $\pm$ 33.27   |
| <b>IL-8 (pg/ml)</b>                              | <b>Control</b> | 1086.29 $\pm$ 233.99 | 1228.04 $\pm$ 267.98 | 1111.93 $\pm$ 199.73 |
|                                                  | <b>TS</b>      | 1461.3 $\pm$ 215.72  | 1208.8 $\pm$ 270.92  | 1123.1 $\pm$ 48.44   |
| <b>IL-6 (pg/ml)</b>                              | <b>Control</b> | 796.4 $\pm$ 376.5    | 678 $\pm$ 277.65     | 813.44 $\pm$ 202.98  |
|                                                  | <b>TS</b>      | 1196.12 $\pm$ 307.29 | 820.54 $\pm$ 117.89  | 772.22 $\pm$ 144.64  |

TS: Tape stripped skin; values are presented as mean %  $\pm$  standard deviation with respect to Control 0 hours values (n=6).

**Supplementary Table 3.** Percentage of *M. furfur* growth and levels of IL-6, IL-8 and TNF- $\alpha$  in skin explants in Control (non-stripped) vs TS (tape stripped) skin explants with or without *M. furfur* inoculation

| 24h after <i>M. furfur</i> inoculation | Control             |                              | TS                 |                              |
|----------------------------------------|---------------------|------------------------------|--------------------|------------------------------|
|                                        | No inoculation      | <i>M. furfur</i> inoculation | No inoculation     | <i>M. furfur</i> inoculation |
| <i>M. furfur</i> (% growth)            | -                   | 61.24 $\pm$ 43.89            | -                  | 204.35 $\pm$ 48.99           |
| TNF- $\alpha$ (pg/ml)                  | 110.76 $\pm$ 1.33   | 188.62 $\pm$ 43.89           | 136.06 $\pm$ 6.27  | 186.03 $\pm$ 27.79           |
| IL-8 (pg/ml)                           | 944.14 $\pm$ 134.73 | 1324.79 $\pm$ 140.16         | 865.83 $\pm$ 20.07 | 1139.32 $\pm$ 87.56          |
| IL-6 (pg/ml)                           | 758.28 $\pm$ 35.70  | 1108.34 $\pm$ 134.73         | 723.26 $\pm$ 79.65 | 1169.75 $\pm$ 304.82         |

Values are presented as mean %  $\pm$  standard deviation (n=6).

**Supplementary Table 4.** Reproducibility of *M. furfur* colony counts in SEBD model

|       | <b>CFUs</b> | <b>log10</b> | <b>% Variability<br/>from daily<br/>mean</b> | <b>% Variability<br/>from overall<br/>mean</b> |
|-------|-------------|--------------|----------------------------------------------|------------------------------------------------|
| Day 1 | 8.20E+05    | 5.91         | 95.69                                        | 91.97                                          |
|       | 1.38E+06    | 6.14         | 99.35                                        | 95.49                                          |
|       | 1.74E+06    | 6.24         | 100.98                                       | 97.05                                          |
|       | 2.60E+06    | 6.41         | 103.80                                       | 99.77                                          |
| Day 2 | 5.80E+06    | 6.76         | 100.65                                       | 105.19                                         |
|       | 5.90E+06    | 6.77         | 100.76                                       | 105.30                                         |
|       | 5.60E+06    | 6.75         | 100.42                                       | 104.95                                         |
|       | 3.90E+06    | 6.59         | 98.08                                        | 102.50                                         |
| Day 3 | 1.85E+06    | 6.27         | 99.64                                        | 97.47                                          |
|       | 3.29E+06    | 6.52         | 103.61                                       | 101.36                                         |
|       | 1.42E+06    | 6.15         | 97.81                                        | 95.68                                          |
|       | 1.65E+06    | 6.22         | 98.85                                        | 96.69                                          |
| Day 4 | 3.06E+06    | 6.49         | 99.47                                        | 100.87                                         |
|       | 2.72E+06    | 6.43         | 98.69                                        | 100.07                                         |
|       | 3.68E+06    | 6.57         | 100.70                                       | 102.11                                         |
|       | 4.01E+06    | 6.60         | 101.28                                       | 102.69                                         |
